# Supplementary material
Source: PubMed Central journal article supplement (PMC2722196)
Supplement: ddp036_1.pdf [file ddp036_1.pdf]

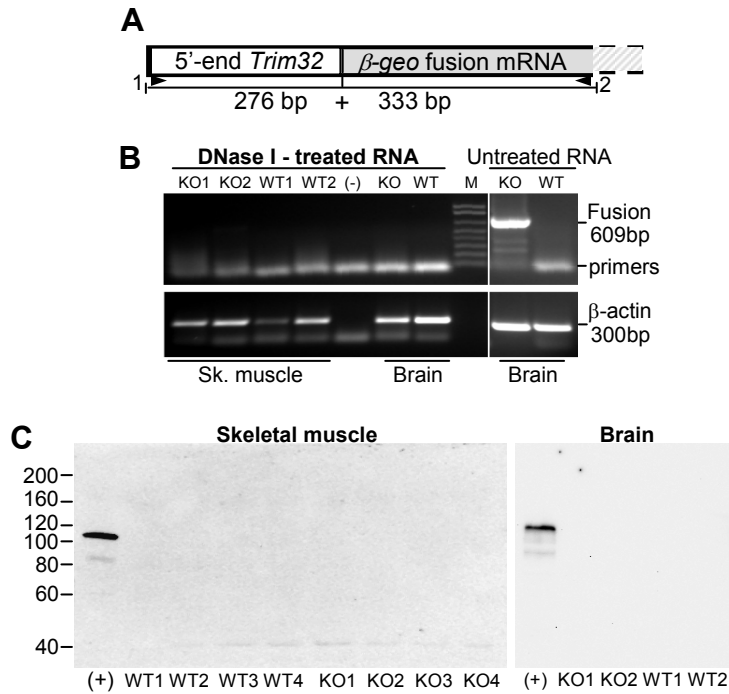

**Figure S1. TRIM32- $\beta$ -geo fusion protein is not produced in T32KO**

- (A) Schematic of hypothetical *Trim32- $\beta$ -geo* fusion mRNA.
- (B) *Trim32- $\beta$ -geo* fusion cDNA was not detected in T32KO muscles or brain by RT-PCR. DNase I untreated RNA from KO tissue was used as a positive control to assure capability of the primers (shown as arrows 1 and 2 in A). M – markers (DNA ladder), Sk. muscle – skeletal muscle, (-) – negative control in which no DNA was added into the PCR reaction.  $\beta$ -actin PCR is shown for loading control.
- (C)  $\beta$ -galactosidase immunoblotting of skeletal muscle (left panel) and brain (right panel) extracts confirmed the absence of TRIM32- $\beta$ -geo fusion protein in KO tissues. Lane (+) – positive control (bacterial lysate expressing  $\beta$ -galactosidase – 116 kDa).

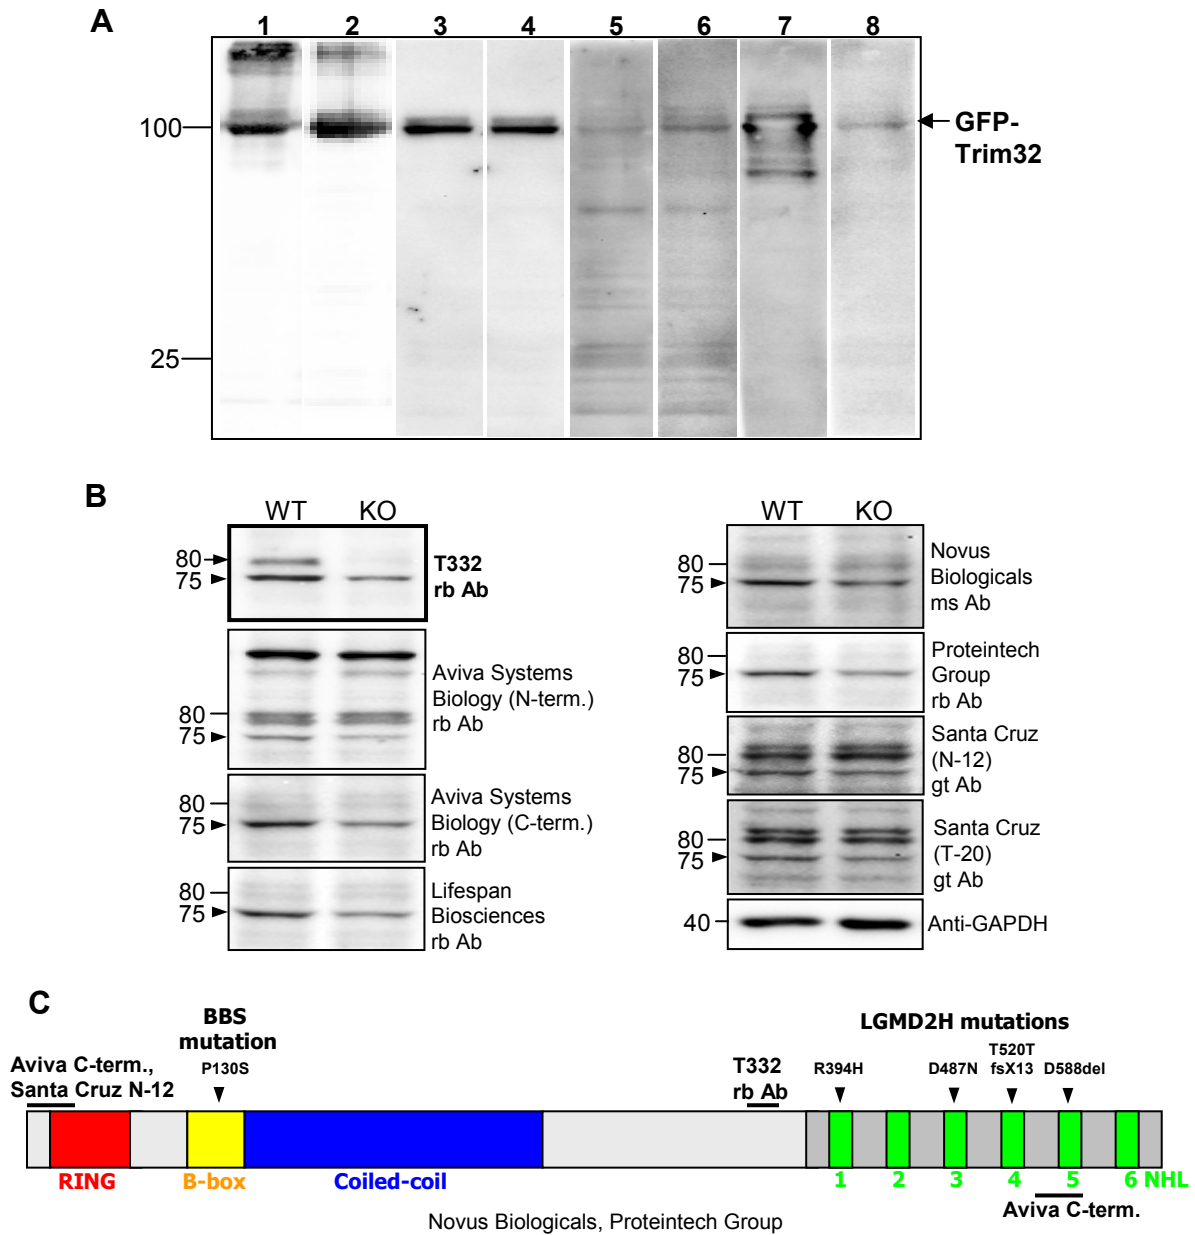

**Figure S2. Western blotting analysis using a panel of anti-TRIM32 antibodies**

- (A) Immunoblotting of recombinant TRIM32 fused to GFP using a panel of anti-TRIM32 antibodies: 1 – T332, 2 – Aviva Systems Biology (N-term.), 3 – Aviva Systems Biology (C-term.), 4 – LifeSpan Biosciences, 5 – Novus Biologicals, 6 – Proteintech Group, 7 – Santa Cruz (N-12), 8 – Santa Cruz (T-20).
- (B) Immunoblotting of brain lysates using TRIM32 antibody from different sources. Note absence of the 80 kDa band in T32KO only with T332 antibody. Anti-GAPDH blot is shown as a loading control.
- (C) Schematic of TRIM32 domain structure with known pathogenic mutations and position of antibody epitopes (where available).

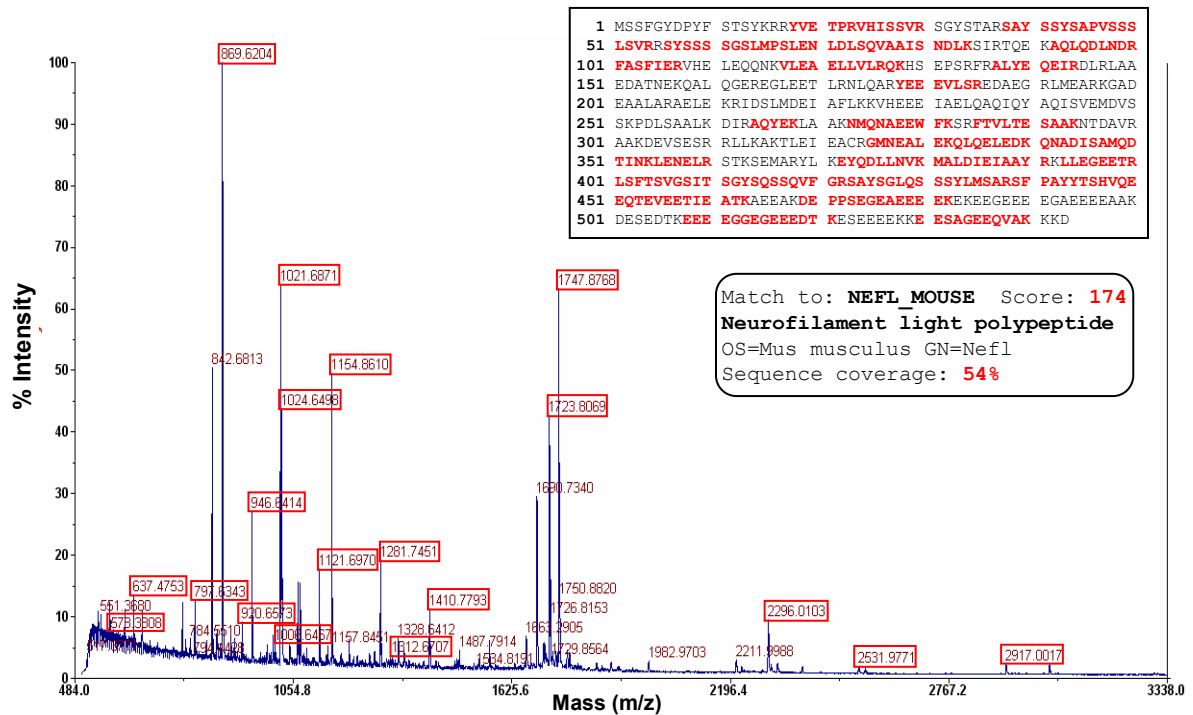

### Figure S3. MALDI-TOF MS

Mass spectrum of the in-gel trypsin-digested immunoprecipitated 75 kDa protein detected in brain lysates by anti-TRIM32 antibodies. Mass signals in red boxes correspond to predicted trypsin-digested peptides of NEFL. Sequence coverage is shown in the inset (matched peptides are shown in red).

**Table S1. Primers used for PCR and genotyping**

| Name                      | Application                  | Primer Sequence (5'->3')     |
|---------------------------|------------------------------|------------------------------|
| (Seqtag up) forward (1)   | Genotyping (Figure 1A,B)     | GGCCATACCATCTGCCGCCAGTGTC    |
| (beta-gal dn) reverse (3) | Genotyping (Figure 1A,B)     | GGGGACGACGACAGTATCGGCCTCAGG  |
| (noCC dn) reverse(2)      | Genotyping (Figure 1A,B)     | CCGCTCCTCAGCTGCCTCCTTGACC    |
| (1) forward               | RT-PCR (Figure 1C,D)         | ATGGCTGCGGCTGCAGCAGCTTCT     |
| (2) forward               | RT-PCR (Figure 1C,D)         | CTGTGGCCATACCATCTGCCG        |
| (3) reverse               | RT-PCR (Figure 1C,D)         | CTGTGTCAATGATCTTCAGCA        |
| (4) reverse               | RT-PCR (Figure 1C,D)         | CCGCTCCTCAGCTGCCTCCTTGACC    |
| (5) reverse               | RT-PCR (Figure 1C,D)         | GCTTCTTGAGAAACAGACACTG       |
| (6) forward               | RT-PCR (Figure 1C,D)         | GGGGCGAAAGGCAGCACTCCCGGC     |
| (7) reverse               | RT-PCR (Figure 1C,D)         | CCCGCCTTCCACGTTAGTCACCTCAAAC |
| (8) reverse               | RT-PCR (Figure 1C,D)         | TTAAGGGGTGGAATATCTTCTCAG     |
| (ASTN2F) forward          | Q-PCR (Figure 1F,G)          | CGAGGCTTTATACGGTTCTGAGC      |
| (ASTN2R) reverse          | Q-PCR (Figure 1F,G)          | GGTGTGGGGCTCAGCTCTTTC        |
| (ASTN2Fex3) forward       | RT-PCR (Figure 1E)           | CCGATCCTCCAGACTTCAGA         |
| (ASTN2Rex16) reverse      | RT-PCR (Figure 1E)           | GCCTGCTGAGAGGGTGATAG         |
| (Fusion) forward (1)      | RT-PCR (Figure S1A,B)        | ATGGCTGCGGCTGCAGCAGCTTCT     |
| (Fusion) reverse (2)      | RT-PCR (Figure S1A,B)        | GGGGACGACGACAGTATCGGCCTCAGG  |
| beta-actin forward        | RT-PCR (Figure 1D,E and S1B) | CGTTGACATCCGTAAGACCTCTA      |
| beta-actin reverse        | RT-PCR (Figure 1D,E and S1B) | TAAAACGCAGCTCAGTAACAGTCCG    |
| Trim32 forward            | Q-PCR (Figure 5A,B)          | GTGGACTCGCGTCGGAGCTG         |
| Trim32 reverse            | Q-PCR (Figure 5A,B)          | GGTTCAGGTGAGAAGCTGCTGC       |
| GAPDH forward             | Q-PCR (Figure 5A,B)          | ACTCCACTCACGGCAAATTC         |
| GAPDH reverse             | Q-PCR (Figure 5A,B)          | TCTCCATGGTGGTGAAGACA         |
| (NEFL up) forward         | Q-PCR (Figure 6C)            | AGCATAACCAGCGGCTACTC         |
| (NEFL dn) reverse         | Q-PCR (Figure 6C)            | TCCTTGGCAGCTTCTTCTCCTCA      |
| (NEFM up) forward         | Q-PCR (Figure 6C)            | AGAACATGCACCAGGCCGAAGAGT     |
| (NEFM dn) reverse         | Q-PCR (Figure 6C)            | GCAAATGACGAGCCATTTCCCACT     |
| (NEFH up) forward         | Q-PCR (Figure 6C)            | GGAGGCCCTGAAAAGCACCAA        |
| (NEFH dn) reverse         | Q-PCR (Figure 6C)            | CAGGAGCTTTCTGTAAGCGGC        |
| (PRPH up) forward         | Q-PCR (Figure 6C)            | GCTCAAGCAGAGGTTAGAAG         |
| (PRPH dn) reverse         | Q-PCR (Figure 6C)            | TCTACGCTCACCTGCAGGTCTC       |
| (INA up) forward          | Q-PCR (Figure 6C)            | GAGGAGATCCACGAGTACCGGC       |
| (INA dn) reverse          | Q-PCR (Figure 6C)            | TGCTAAACCGCGTCTCTTCAC        |
| (GAPDH up) forward        | Q-PCR (Figure 6C)            | GACTTCAACAGCAACTCCCAC        |
| (GAPDH dn) reverse        | Q-PCR (Figure 6C)            | TCCACCACCCTGTTGCTGTA         |
